# Supplementary material
Source: PubMed Central journal article supplement (PMC5969375)
Supplement: blood803072-suppl1.pdf [file blood803072-suppl1.pdf]

**Supplementary Materials to:**

**Minimal Residual Hairy Cell Leukemia Eradication With Moxetumomab  
Pasudotox: Phase I Results and Long-term Follow-up**

Robert J. Kreitman, MD,<sup>1</sup> Martin S. Tallman, MD,<sup>2</sup> Tadeusz Robak, MD, PhD,<sup>3</sup> Steven Coutre, MD,<sup>4</sup> Wyndham H. Wilson, MD, PhD,<sup>5</sup> Maryalice Stetler-Stevenson, MD, PhD,<sup>6</sup> David J. FitzGerald, PhD,<sup>1</sup> Lesley Mathews, CRNP,<sup>1</sup> Linda Santiago, PharmD,<sup>7</sup> Guozhi Gao, PhD,<sup>7</sup> Mark C. Lanasa, MD, PhD,<sup>7</sup> Ira Pastan, MD<sup>1</sup>

<sup>1</sup>Laboratory of Molecular Biology, National Cancer Institute (NCI), National Institutes of Health (NIH), Bethesda, MD; <sup>2</sup>Leukemia Service, Memorial Sloan Kettering Cancer Center, Weill Cornell Medical College, New York, NY; <sup>3</sup>Department of Haematology, Medical University of Lodz and Copernicus Memorial Hospital, Lodz, Poland; <sup>4</sup>Stanford University School of Medicine, Stanford, CA; <sup>5</sup>Metabolism Branch, NCI, NIH;

<sup>6</sup>Laboratory of Pathology, NCI, NIH; Gaithersburg, MD; <sup>7</sup>MedImmune, Gaithersburg, MD

**Corresponding author:** Robert J. Kreitman, M.D., National Institutes of Health, Building 37/5124b, 9000 Rockville Pike, Bethesda, MD 20892; Tel: 301-496-6947; Fax: 301-480-2645; E-mail: kreitmar@mail.nih.gov

## Flow cytometry

Specimens were processed within 12 hours of collection. Red blood cells were lysed by incubating with hypertonic ammonium chloride solution (150 mM NH<sub>4</sub>Cl, 10 mM KHCO<sub>3</sub>, 0.1 mM EDTA) for 10 minutes at room temperature (maintained at 21–23°C) at a ratio of 1:9 (volume of sample: volume of lysing solution). Specimens were then washed twice with phosphate buffered saline to remove cytophilic antibodies before determining cell number. Cells were then stained for 30 minutes at room temperature with a panel of antibodies (Table S1) as previously described.<sup>1</sup> Viability of lysed and washed cells was assessed by staining with the fluorescent dye 7-amino-actinomycin D (7-AAD) for 10 minutes at room temperature (7-AAD only stains non-viable cells). All cells were fixed in 1.0% paraformaldehyde and stored at 4°C for up to 12 hours before acquisition. Specimens were acquired using an 8-color multiparametric approach on a 3-laser FACSCanto II (BD Biosciences, San Jose, CA) with DiVa 6.1.1 software and analyzed by FCS Express 3 software (DeNovo Software, Los Angeles, CA). One to 1.5 million cells were acquired for each cocktail. For analysis of MRD flow cytometric data were evaluated for hairy cells in the following sequence: all cells; CD19 positive cells; and mononuclear cells (based upon light scatter characteristics). To detect residual hairy cell leukemia, cells coexpressing CD19, CD11c, CD25, CD103 and CD123 were identified and quantitated. The presence of residual hairy cell leukemia was confirmed in all cases by identifying cells coexpressing CD19, CD20, CD22, bright CD11c, and monoclonal light chains. The validated limit of detection of minimal residual hairy cell leukemia is 0.002% of cells, similar to the 10<sup>-4</sup> limit reported for chronic lymphocytic leukemia.<sup>2,3</sup>

**Table S1.** Panel of Antibodies for Staining in Flow Cytometry Procedure

| <b>FITC</b>       | <b>PE</b>         | <b>PerCP</b> | <b>PC7</b> | <b>APC</b>       | <b>AH7</b> | <b>v450</b> | <b>v500</b> |
|-------------------|-------------------|--------------|------------|------------------|------------|-------------|-------------|
| CD16              | CD19              | CD3          | CD13       | CD34             | CD14       | CD56        | CD45        |
| CD57              | TCR gd            | CD4          | CD3        | CD5              | CD8        | CD56        | CD45        |
| CD103             | CD25              | CD123        | CD19       | CD23             | CD20       | CD11c       | CD45        |
| Kappa-monoclonal  | Lambda-monoclonal | CD20         | CD19       | CD10             | CD14       | CD11c       | CD45        |
| Lambda-polyclonal | CD22              | CD5          | CD19       | Kappa-polyclonal | CD20       | 11c         | CD45        |

Abbreviations: APC, allophycocyanin conjugate; FITC, fluorescein isothiocyanate; PC7, proprotein convertase 7; PE, phycoerythrin; PerCP, peridinin-chlorophyll-protein complex conjugate; TCR gd, T-cell receptor gamma delta.

**Table S2.** Patient characteristics prior to treatment

| Parameter                                                    | Dose Level — µg/kg Every Other Day × Three Doses |                            |                           |                         |
|--------------------------------------------------------------|--------------------------------------------------|----------------------------|---------------------------|-------------------------|
|                                                              | 5 to 40<br>(N = 16)                              | 50 (extension)<br>(N = 21) | 50 (combined)<br>(N = 33) | Total<br>(N = 49)       |
| Age, median (range) — yr                                     | 58 (40–77)                                       | 54 (40–73)                 | 55 (40–74)                | 57 (40–77)              |
| Male-Female - no.                                            | 13-3                                             | 18-3                       | 28-5                      | 41-8                    |
| Prior purine analog courses no (%)                           |                                                  |                            |                           |                         |
| 1                                                            | 1 (6)                                            | 3 (14)                     | 3 (9)                     | 4 (8)                   |
| 2                                                            | 7 (44)                                           | 12 (57)                    | 17 (52)                   | 24 (49)                 |
| ≥3                                                           | 8 (50)                                           | 6 (29)                     | 13 (39)                   | 21 (43)                 |
| Prior rituximab courses, no. (%)                             | 8 (50)                                           | 14 (67)                    | 22 (67)                   | 30 (61)                 |
| Prior splenectomy, no. (%)                                   | 4 (25)                                           | 1 (5)                      | 4 (12)                    | 8 (16)                  |
| Evaluable for spleen size, no.                               | 12                                               | 20                         | 28                        | 40                      |
| Maximum spleen size, median<br>(range), mm                   | 150<br>(112–194)                                 | 145<br>(95–225)            | 145<br>(95–225)           | 145<br>(95–225)         |
| White blood cells — cells/nL*                                | 1.90<br>(0.76–25.1)                              | 1.85<br>(0.69–10.0)        | 1.89<br>(0.69–63.7)       | 1.89<br>(0.69–63.7)     |
| Neutrophils — cells/nL*                                      | 0.75<br>(0.27–5.82)                              | 0.86<br>(0.17–4.39)        | 0.86<br>(0.08–6.86)       | 0.78<br>(0.08–6.86)     |
| Lymphocytes — cells/nL*                                      | 1.17 (0.16–<br>14.1)                             | 0.65 (0.24–<br>12.0)       | 0.81 (0.24–<br>58.6)      | 0.86 (0.16–<br>58.6)    |
| Hemoglobin — g/dL*                                           | 11.2<br>(6–14.4)                                 | 10.1<br>(7.1–12.7)         | 10.1<br>(6.7–14.2)        | 10.3 (6.0–<br>14.4)     |
| Platelets — cells/nL*                                        | 65 (6–167)                                       | 59 (23–90)                 | 60 (22–125)               | 60 (6–167)              |
| Circulating HCL cells/mm <sup>3</sup> ,<br>median, n (Range) | 61 (n=16)<br>(1.6–14,566)                        | 12 (n=21)<br>(0.8–11,195)  | 19 (n=32)<br>(0.8–60,444) | 35 (n=48)<br>(1–60,444) |

When not otherwise indicated, the number of patients evaluable for each measurement is the number enrolled.

\*Data are from the National Cancer Institute database.

Abbreviations: HCL, hairy cell leukemia.

**Table S3.** Treatment-Related Grade 3 and 4 Adverse Events at 50 µg/kg\*

| Adverse Event, no. (%)               | Grade   | Extension | Combined |
|--------------------------------------|---------|-----------|----------|
|                                      |         | (N = 21)  | (N = 33) |
| Alanine transaminase increased       | 3       | 3 (15)    | 3 (9)    |
| Gamma glutamyl transferase increased | 3       | 1 (5)     | 2 (6)    |
| Lymphopenia                          | 3 and 4 | 1 (5)     | 2 (6)    |
| White blood cell count decreased     | 3 and 4 | 2 (10)    | 2 (6)    |
| Febrile neutropenia                  | 3       | 0         | 1 (3)    |
| Hypoalbuminemia                      | 3       | 0         | 1 (3)    |
| Pyrexia                              | 3       | 0         | 1 (3)    |
| Haptoglobin decreased                | 3       | 1 (5)     | 1 (3)    |
| Neutrophil count decreased           | 3       | 1 (5)     | 1 (3)    |

\*The only treatment-related grade 3/4 event observed at doses less than 50 µg/kg was grade 3 haptoglobin decrease at 30 µg/kg, which was associated with grade 2 hemolytic uremic syndrome.

**Table S4.** Clinical Treatment-Related Adverse Events Observed in Two or More Patients

| Adverse Event,<br>no. (%) | Dose Level (µg/kg every other day × 3 doses) |          |          |          |          |                   |                  | Total<br>(N = 49) |
|---------------------------|----------------------------------------------|----------|----------|----------|----------|-------------------|------------------|-------------------|
|                           | 3                                            | 10       | 20       | 30       | 40       | 50<br>(extension) | 50<br>(combined) |                   |
|                           | (N = 3)                                      | (N = 3)  | (N = 3)  | (N = 3)  | (N = 4)  | N = 21)           | (N = 33)         |                   |
| Edema peripheral          | 1 (33.3)                                     | 1 (33.3) | 1 (33.3) | 3 (100)  | 3 (75.0) | 6 (28.6)          | 12 (36.4)        | 21 (42.9)         |
| Pyrexia                   | 1 (33.3)                                     | 1 (33.3) | 2 (66.7) | 3 (100)  | 0        | 9 (42.9)          | 14 (42.4)        | 21 (42.9)         |
| Myalgia                   | 0                                            | 0        | 0        | 2 (66.7) | 1 (25.0) | 12 (57.1)         | 17 (51.5)        | 20 (40.8)         |
| Headache                  | 1 (33.3)                                     | 1 (33.3) | 1 (33.3) | 2 (66.7) | 1 (25.0) | 9 (42.9)          | 12 (36.4)        | 18 (36.7)         |
| Nausea                    | 1 (33.3)                                     | 0        | 0        | 1 (33.3) | 2 (50.0) | 9 (42.9)          | 12 (36.4)        | 16 (32.7)         |
| Fatigue                   | 1 (33.3)                                     | 1 (33.3) | 1 (33.3) | 3 (100)  | 0        | 7 (33.3)          | 8 (24.2)         | 14 (28.6)         |
| Edema                     | 1 (33.3)                                     | 1 (33.3) | 0        | 1 (33.3) | 1 (25.0) | 5 (23.8)          | 8 (24.2)         | 12 (24.5)         |
| Hypotension               | 0                                            | 0        | 0        | 2 (66.7) | 0        | 7 (33.3)          | 10 (30.3)        | 12 (24.5)         |
| Chills                    | 1 (33.3)                                     | 0        | 0        | 1 (33.3) | 0        | 6 (28.6)          | 9 (27.3)         | 11 (22.4)         |
| Capillary leak            | 1 (33.3)                                     | 0        | 0        | 1 (33.3) | 0        | 1 (4.8)           | 6 (18.2)         | 8 (16.3)          |

|                    |          |   |          |          |          |          |          |          |
|--------------------|----------|---|----------|----------|----------|----------|----------|----------|
| syndrome           |          |   |          |          |          |          |          |          |
| Dizziness          | 0        | 0 | 0        | 0        | 1 (25.0) | 5 (23.8) | 6 (18.2) | 7 (14.3) |
| Weight increased   | 1 (33.3) | 0 | 0        | 0        | 0        | 1 (4.8)  | 6 (18.2) | 7 (14.3) |
| Arthralgia         | 0        | 0 | 0        | 0        | 0        | 4 (19.0) | 5 (15.2) | 5 (10.2) |
| Back pain          | 0        | 0 | 0        | 0        | 0        | 4 (19.0) | 4 (12.1) | 4 (8.2)  |
| Diarrhea           | 1 (33.3) | 0 | 0        | 0        | 1 (25.0) | 2 (9.5)  | 2 (6.1)  | 4 (8.2)  |
| Vomiting           | 0        | 0 | 0        | 0        | 1 (25.0) | 2 (9.5)  | 3 (9.1)  | 4 (8.2)  |
| Decreased appetite | 1 (33.3) | 0 | 0        | 0        | 0        | 2 (9.5)  | 2 (6.1)  | 3 (6.1)  |
| Hyperhidrosis      | 0        | 0 | 0        | 1 (33.3) | 0        | 2 (9.5)  | 2 (6.1)  | 3 (6.1)  |
| Sinus tachycardia  | 0        | 0 | 0        | 1 (33.3) | 0        | 1 (4.8)  | 1 (3.0)  | 2 (4.1)  |
| Abdominal pain     | 0        | 0 | 0        | 0        | 0        | 2 (9.5)  | 2 (6.1)  | 2 (4.1)  |
| Constipation       | 0        | 0 | 0        | 1 (33.3) | 0        | 1 (4.8)  | 1 (3.0)  | 2 (4.1)  |
| Face edema         | 0        | 0 | 1 (33.3) | 1 (33.3) | 0        | 0        | 0        | 2 (4.1)  |
| Localized edema    | 0        | 0 | 0        | 0        | 1 (25.0) | 1 (4.8)  | 1 (3.0)  | 2 (4.1)  |

|                  |   |          |   |          |   |         |         |         |
|------------------|---|----------|---|----------|---|---------|---------|---------|
| Bone pain        | 0 | 0        | 0 | 1 (33.3) | 0 | 1 (4.8) | 1 (3.0) | 2 (4.1) |
| Neck pain        | 0 | 0        | 0 | 0        | 0 | 2 (9.5) | 2 (6.1) | 2 (4.1) |
| Cough            | 0 | 0        | 0 | 0        | 0 | 1 (4.8) | 2 (6.1) | 2 (4.1) |
| Dyspnea          | 0 | 0        | 0 | 1 (33.3) | 0 | 1 (4.8) | 1 (3.0) | 2 (4.1) |
| Productive cough | 0 | 0        | 0 | 0        | 0 | 0       | 2 (6.1) | 2 (4.1) |
| Hypertension     | 0 | 1 (33.3) | 0 | 1 (33.3) | 0 | 0       | 0       | 2 (4.1) |



**Table S5.** Laboratory Treatment-Related Adverse Events Observed in Two or More Patients

| Adverse event, no. (%)              | Dose Level (µg/kg every other day × 3 doses) |               |               |               |               |                               |                              | Total<br>(N = 49) |
|-------------------------------------|----------------------------------------------|---------------|---------------|---------------|---------------|-------------------------------|------------------------------|-------------------|
|                                     | 3<br>(N = 3)                                 | 10<br>(N = 3) | 20<br>(N = 3) | 30<br>(N = 3) | 40<br>(N = 4) | 50<br>(extension)<br>(N = 21) | 50<br>(Combined)<br>(N = 33) |                   |
| Hypoalbuminemia                     | 2 (66.7)                                     | 1 (33.3)      | 1 (33.3)      | 3 (100)       | 3 (75.0)      | 16 (76.2)                     | 24 (72.7)                    | 34 (69.4)         |
| Alanine transaminase<br>increased   | 1 (33.3)                                     | 1 (33.3)      | 1 (33.3)      | 3 (100)       | 2 (50.0)      | 16 (76.2)                     | 23 (69.7)                    | 31 (63.3)         |
| Aspartate transaminase<br>increased | 2 (66.7)                                     | 1 (33.3)      | 1 (33.3)      | 2 (66.7)      | 1 (25.0)      | 17 (81.0)                     | 23 (69.7)                    | 30 (61.2)         |
| Blood creatinine<br>increased       | 0                                            | 0             | 0             | 1 (33.3)      | 0             | 6 (28.6)                      | 8 (24.2)                     | 9 (18.4)          |
| Proteinuria                         | 0                                            | 0             | 0             | 0             | 0             | 8 (38.1)                      | 9 (27.3)                     | 9 (18.4)          |
| Hemorrhage urinary tract            | 0                                            | 0             | 0             | 1 (33.3)      | 1 (25.0)      | 4 (19.0)                      | 5 (15.2)                     | 7 (14.3)          |
| Gamma glutamyl                      | 0                                            | 0             | 0             | 0             | 0             | 4 (19.0)                      | 6 (18.2)                     | 6 (12.2)          |

|                            |          |   |   |          |          |         |         |         |
|----------------------------|----------|---|---|----------|----------|---------|---------|---------|
| transferase increased      |          |   |   |          |          |         |         |         |
| White blood cell decreased | 1 (33.3) | 0 | 0 | 0        | 0        | 2 (9.5) | 3 (9.1) | 4 (8.2) |
| Lymphopenia                | 0        | 0 | 0 | 0        | 0        | 1 (4.8) | 3 (9.1) | 3 (6.1) |
| Blood albumin decreased    | 0        | 0 | 0 | 0        | 0        | 0       | 2 (6.1) | 2 (4.1) |
| Blood magnesium decreased  |          |   |   |          |          |         |         |         |
|                            | 0        | 0 | 0 | 0        | 1 (25.0) | 0       | 1 (3.0) | 2 (4.1) |
| Haptoglobin decreased      | 0        | 0 | 0 | 1 (33.3) | 0        | 1 (4.8) | 1 (3.0) | 2 (4.1) |
| Hemoglobinuria             | 0        | 0 | 0 | 0        | 0        | 1 (4.8) | 2 (6.1) | 2 (4.1) |
| Hemolytic uremic syndrome  |          |   |   |          |          |         |         |         |
|                            | 0        | 0 | 0 | 1 (33.3) | 0        | 0       | 1 (3.0) | 2 (4.1) |
| Platelet count decreased   | 0        | 0 | 0 | 0        | 1 (25.0) | 1 (4.8) | 1 (3.0) | 2 (4.1) |
| Protein urine present      | 0        | 0 | 0 | 0        | 1 (25.0) | 0       | 1 (3.0) | 2 (4.1) |

**Table S6.** Change from Baseline in Hematology (NCI Extension Cohort)

| Parameter                            | Baseline | Visit            | Visit | Change from Baseline |      |        |               |
|--------------------------------------|----------|------------------|-------|----------------------|------|--------|---------------|
|                                      | Mean     |                  | Mean  | Mean                 | SD   | Median | Range         |
| Hemoglobin<br>(g/dL)                 | 10.5     | Nadir on-study   | 9.2   | -1.3                 | 1.2  | -1.5   | (-2.9, 2.5)   |
|                                      |          | Zenith on-study  | 13.5  | 3.0                  | 1.9  | 2.2    | (0.1, 5.6)    |
|                                      |          | End of treatment | 12.9  | 2.4                  | 2.2  | 2.2    | (-0.9, 5.6)   |
| Platelets (10 <sup>3</sup> /uL)      | 59.4     | Nadir on-study   | 49.6  | -9.8                 | 7.4  | -8.0   | (-26.0, 0.0)  |
|                                      |          | Zenith on-study  | 284.7 | 225.3                | 96.4 | 210.0  | (14.0, 420.0) |
|                                      |          | End of treatment | 212.1 | 152.7                | 93.7 | 134.0  | (5.0, 387.0)  |
| Neutrophils<br>(10 <sup>3</sup> /uL) | 1.0      | Nadir on-study   | 0.5   | -0.5                 | 0.8  | -0.3   | (-3.6, 0.2)   |
|                                      |          | Zenith on-study  | 5.9   | 4.9                  | 2.8  | 4.2    | (0.9, 11.6)   |
|                                      |          | End of treatment | 3.2   | 2.2                  | 1.5  | 2.0    | (-0.6, 5.6)   |

Abbreviations: NCI, National Cancer Institute.

**Table S7.** Response of HCL to Moxetumomab Pasudotox at Different Dose Levels

| Dose Level,<br>µg/kg* | ORR |         | PR      |         | CR      |         | MRD-Negative CR         |  |
|-----------------------|-----|---------|---------|---------|---------|---------|-------------------------|--|
|                       | No. | No. (%) | no./No. (%)             |  |
| 5                     | 3   | 3 (100) | 3 (100) | 0 (0)   | 0 (0)   | 0 (0)   | 0/3 (0)                 |  |
| 10                    | 3   | 3 (100) | 1 (33)  | 2 (67)  | 2 (67)  | 0 (0)   | 0/2 (0)                 |  |
| 20                    | 3   | 2 (67)  | 0 (0)   | 2 (67)  | 2 (67)  | 0 (0)   | 0/2 (0)                 |  |
| 30                    | 3   | 2 (67)  | 1 (33)  | 1 (33)  | 1 (33)  | 0 (0)   | 0/3 (0)                 |  |
| 40                    | 4   | 3 (75)  | 1 (25)  | 2 (50)  | 2 (50)  | 1 (25)  | 1/3 <sup>†</sup> (33)   |  |
| 50 (extension)        | 21  | 19 (91) | 4 (19)  | 15 (71) | 15 (71) | 8 (38)  | 8/21 (38)               |  |
| 50 (combined)         | 33  | 29 (88) | 8 (24)  | 21 (64) | 21 (64) | 11 (34) | 11/32 <sup>†</sup> (34) |  |
| Total                 | 49  | 42 (86) | 14 (29) | 28 (57) | 28 (57) | 12 (25) | 12/49 (25)              |  |

\*All doses were administered every other day for three doses.

<sup>†</sup>One patient at 50 µg/kg with minimal residual disease-negative CR documented off study during follow-up was not included in this analysis. One CR at 40 µg/kg was not evaluated by bone marrow aspirate flow cytometry.

Abbreviations: CR, complete remission; HCL, hairy cell leukemia; MRD, minimal residual disease; ORR, objective response rate; PR, partial response.

**Table S8.** Flow Cytometry Minimal Residual Disease Status of Patients in CR at 50 µg/kg Every Other Day x Three Doses (National Cancer Institute extension cohort).

| <b>Patients, No.</b> | <b>Blood</b> | <b>Bone Marrow</b> |
|----------------------|--------------|--------------------|
| 11                   | Negative     | Negative           |
| 8                    | Negative     | Positive           |
| 1                    | Positive     | Positive           |
| 1                    | Unknown      | Unknown            |

Abbreviations: CR, complete remission.

**Table S9.** Pharmacokinetics of Moxetumomab Pasudotox at 50 µg/kg During Cycles 1 and 2

| Parameter, median<br>(range)         | Cycle 1         | Cycle 1           | Cycle 2           | Cycle 2          |
|--------------------------------------|-----------------|-------------------|-------------------|------------------|
|                                      | Day 1           | Day 5             | Day 1             | Day 5            |
| No. evaluable                        | N = 28          | N = 29            | N = 29            | N = 29           |
| Peak level (ng/mL)                   | 326<br>(58–958) | 758<br>(163–1440) | 633<br>(149–1470) | 796<br>(70–1787) |
| Half-life* (min)                     | 56 (8–397)      | 107 (8–672)       | 106 (10–206)      | 115 (10–188)     |
| Area under the curve*<br>(µg/min/mL) | 15 (5–131) ( )  | 107 (6–356)       | 106 (8–300)       | 139 (7–374)      |
| Volume of distribution (L)           | 21 (4–205)      | 6 (2–147)         | 6 (3–106)         | 6 (2–28)         |
| Clearance — mL/min                   | 261 (30–812)    | 38 (10–726)       | 36 (16–509)       | 29 (13–547)      |

\*For patients wherein biexponential disappearance was relevant, the half-life chosen reflect the second (half-life  $\beta$ ). Area under the concentration-time curve with biexponential parameters were included in the summary where relevant.

**Table S10.** Percentage Change in Pharmacokinetic Parameters From Day 1 to Day 5 at Moxetumomab Pasudotox 50-µg/kg Dose Level

| <b>Parameter, Median %<br/>Change (range)</b> | <b>Change from Cycle 1<br/>Days 1 to 5</b> | <b>Change from Cycle 2<br/>Days 1 to 5</b> |
|-----------------------------------------------|--------------------------------------------|--------------------------------------------|
| No. evaluable                                 | N = 28                                     | N = 29                                     |
| Peak level — ng/mL                            | 118%–885% (213%)<br><i>P</i> < .001        | 47%–426% (121%)<br><i>P</i> = .002         |
| Half-life                                     | 206% (8%–1995%)<br><i>P</i> < .001         | 122% (26%–451%)<br><i>P</i> < .001         |
| Area under the curve                          | 512% (92%–3068%)<br><i>P</i> < .001)       | 147% (68%–465%)<br><i>P</i> < .001         |
| Volume of distribution                        | 33% (2%–1262%)<br><i>P</i> = .009          | 90% (6%–165%)<br><i>P</i> = .06            |
| Clearance                                     | 20% (3%–111%)<br><i>P</i> < .001           | 72% (22%–150%)<br><i>P</i> < .001          |

**Table S11.** Immunogenicity of Moxetumomab Pasudotox in HCL\*

| Parameter                                                                | Dose Level — µg/kg Every Other Day × Three Doses |                      |               |                |           |
|--------------------------------------------------------------------------|--------------------------------------------------|----------------------|---------------|----------------|-----------|
|                                                                          | 5 to 40                                          | P value <sup>†</sup> | 50 (Combined) | 50 (extension) | Total     |
| No. of patients evaluable                                                | 14                                               |                      | 32            | 21             | 46        |
| >50% of 200 ng/mL, No. (%)                                               | 12 (86%)                                         | 0.70                 | 24 (75%)      | 18 (86%)       | 36 (78%)  |
| >75% of 1000 ng/mL - no. (%)                                             | 5 (36%)                                          | 0.35                 | 17 (53%)      | 13 (62%)       | 22 (48%)  |
| Evaluable per cycle, No. <sup>‡</sup>                                    | 13                                               |                      | 29            | 21             | 42        |
| >50% of 200 ng/mL, No. (%)                                               | 11 (85%)                                         | 0.47                 | 21 (72%)      | 18 (86%)       | 32 (76%)  |
| >75% of 1000 ng/mL, No. (%)                                              | 5 (38%)                                          | 0.51                 | 16 (55%)      | 13 (62%)       | 21 (50%)  |
| Cycles prior to neutralization for those patients who neutralized (N=36) |                                                  |                      |               |                |           |
| >50% of 200 ng/mL, No. (range)                                           | 3.0 (1–8)                                        |                      | 3.0 (1–7)     | 3.0 (1–7)      | 3.0 (1–8) |
| >75% of 1000 ng/mL, No. (range)                                          | 2.5 (1–4)                                        |                      | 3.0 (2–7)     | 3.0 (2–7)      | 3.0 (1–7) |

\*Trends for higher rate of CR without MRD (8 of 15 vs. 3 of 17;  $P = .06$ ) and longer CR duration (median undefined vs. 19.1 months,  $P = .05$ ) were observed in patients without vs. with antibodies neutralizing more than 75% of the activity of 1000 ng/m of moxetumomab pasudotox.

<sup>†</sup>P values indicate comparison between patients receiving doses of 50 µg/kg vs. those receiving 5 to 40 µg/kg.

<sup>‡</sup>Patients who were evaluated after each cycle; only these patients evaluated for number of cycles prior to neutralization.<sup>‡</sup>

Abbreviations: CR, complete remission; HCL, hairy cell leukemia; MRD, minimal residual disease.



**Table S12.** Soluble CD22 Levels and Change in Levels With Moxetumomab Pasudotox at Moxetumomab Pasudotox 50-µg/kg Dose Level

| <b>Soluble CD22 prior to cycle 1 — median (range), ng/mL</b>                                 |                          | <b>P value</b> |
|----------------------------------------------------------------------------------------------|--------------------------|----------------|
| CR                                                                                           | 15 (4–125); n = 19       | 0.02           |
| No CR                                                                                        | 50 (6–353); n = 10       |                |
| CR without MRD                                                                               | 12 (4–23); n = 10        | 0.15           |
| CR with MRD                                                                                  | 23 (5–125); n = 8        |                |
| <b>Soluble CD22 prior to cycle 2 (ng/mL) — median (range), ng/mL</b>                         |                          | <b>P value</b> |
| CR                                                                                           | 3 (0–38.0); n = 13       | 0.07           |
| No CR                                                                                        | 10 (2–91); n = 7         |                |
| CR without MRD                                                                               | 1 (0–2); n = 5           | 0.02           |
| CR with MRD                                                                                  | 5 (1–38); n = 7          |                |
| <b>Percent change in soluble CD22 from before cycle 2 to before cycle 1 — median (range)</b> |                          | <b>P value</b> |
| CR                                                                                           | -83 (-96 to -43); n = 12 | 0.08           |
| No CR                                                                                        | -69 (-81 to 12); n = 6   |                |
| CR without MRD                                                                               | -91 (-96 to -77); n = 5  | 0.13           |
| CR with MRD                                                                                  | -77 (-90 to -66); n = 6  |                |
| <b>Soluble CD22 at the time of restaging — median (range), ng/mL</b>                         |                          | <b>P value</b> |
| CR                                                                                           | 0 (0–3); n = 10          | 0.18           |
| No CR                                                                                        | 13 (NA); n = 1           |                |
| CR without MRD                                                                               | 0 (0–1); n = 6           | 0.05           |
| CR with MRD                                                                                  | 2 (1–3); n = 3           |                |

Abbreviations: CR, complete remission; MRD, minimal residual disease.

**Figure S1.** Effect of moxetumomab pasudotox on normal lymphocytes. Flow cytometric analysis of lymphocytes in posttreatment samples, obtained after one or two cycles of moxetumomab pasudotox, contained no detectable residual HCL cells.

Abbreviations: HCL, hairy cell leukemia.

**A.**

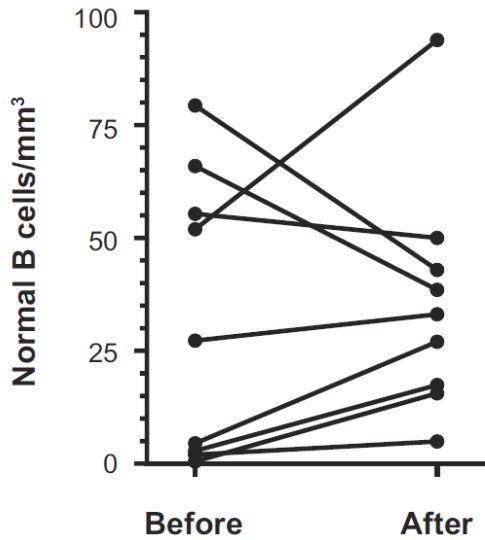

**B.**

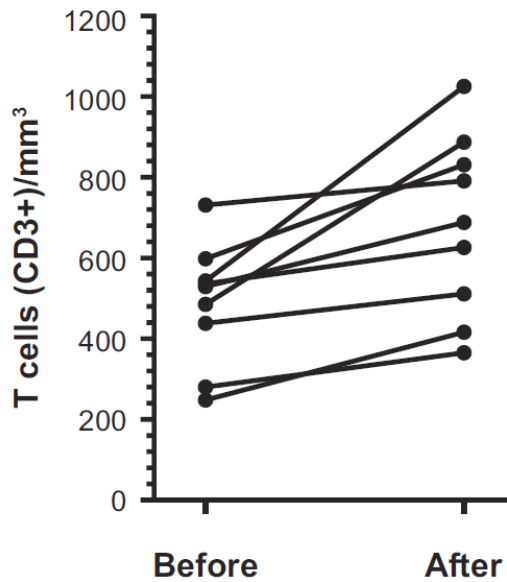

C.

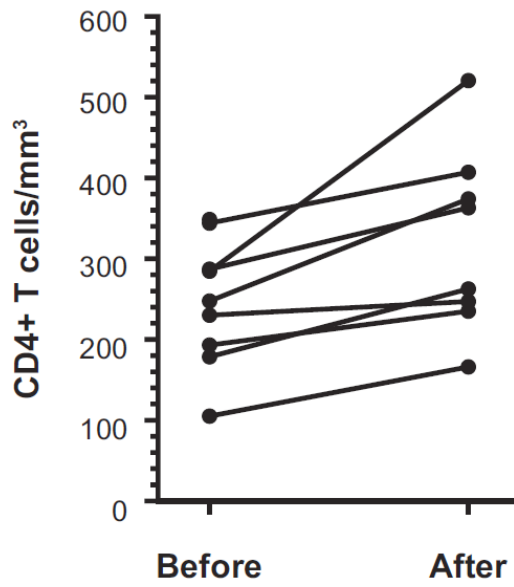

D.

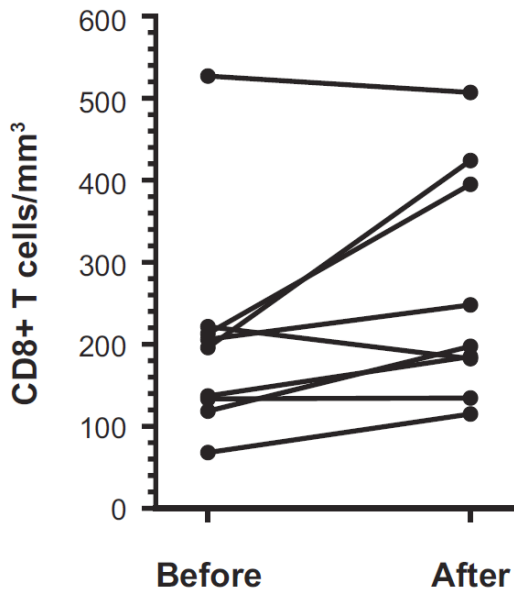

**Figure S2.** Time to Response (safety population). Achievement of objective response or CR is shown from the time of beginning treatment. Points represent patients treated at 5 (□), 10 (△), 20 (◇), 30 (◻), 40 (○) and 50 (unlabeled) µg/kg every other day × three doses. For CR, since a bone marrow negative for HCL was required, in addition to resolved cytopenias for at least 4 weeks, bone marrows were not undertaken until the latter criterion was fulfilled.

Abbreviations: CR, complete remission; HCL, hairy cell leukemia.

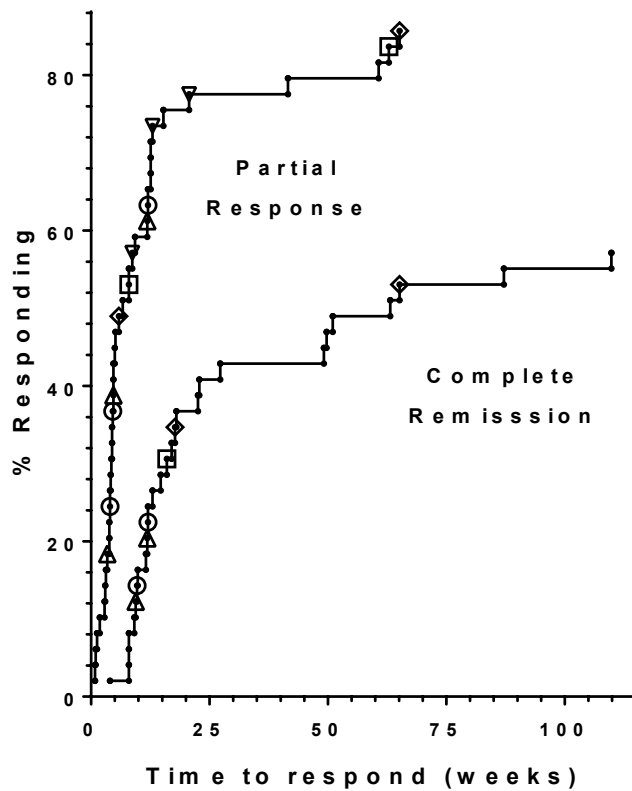

**Figure S3.** Soluble CD22 after 1 cycle of moxetumomab pasudotox. Concentrations before cycle 1 and before cycle 2 for patients at 50 µg/kg who achieved CR with negative (A) or positive (B) MRD, partial response (C), or stable disease (D).

Abbreviations: CR, complete remission; Cy, cycle; MRD, minimal residual disease.

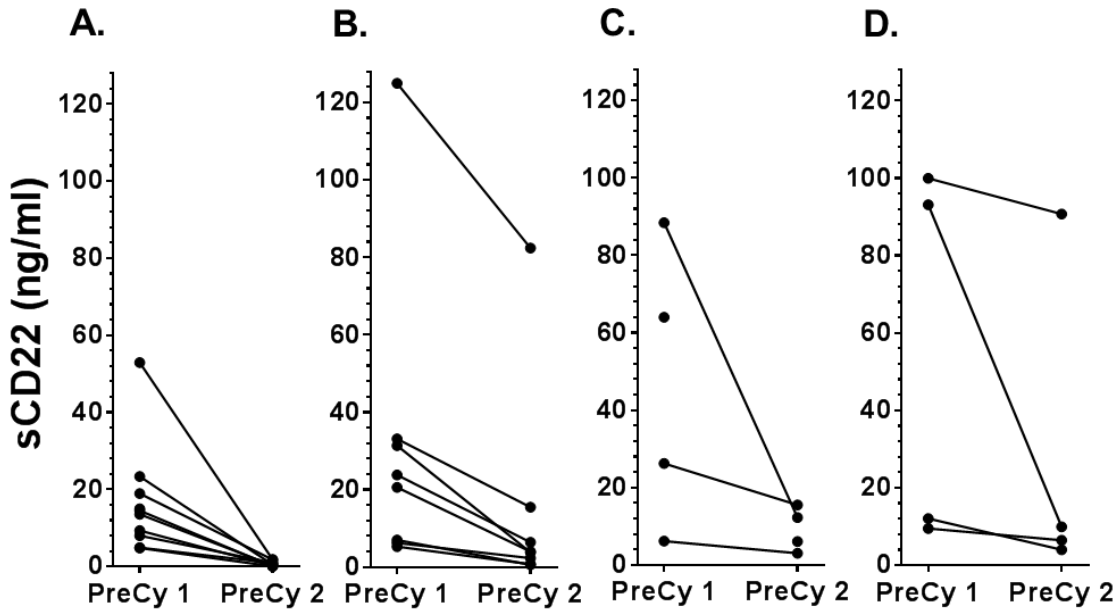

## References

1. Jasper GA, Arun I, Venzon D, et al. Variables affecting the quantitation of CD22 in neoplastic B cells. *Cytometry B Clin Cytom.* 2011;80(2):83-90.
2. Bottcher S, Ritgen M, Fischer K, et al. Minimal residual disease quantification is an independent predictor of progression-free and overall survival in chronic lymphocytic leukemia: a multivariate analysis from the randomized GCLLSG CLL8 trial. *J Clin Oncol.* 2012;30(9):980-988.
3. Bottcher S, Ritgen M, Kneba M. Flow cytometric MRD detection in selected mature B-cell malignancies. *Methods Mol Biol.* 2013;971:149-174.
